# Supplementary material
Source: HighWire-hosted journal article supplement (https://gh.bmj.com/content/4/6/e001670)
Supplement: inline-supplementary-material-1 [file inline-supplementary-material-1.pdf]

**Supplementary Table 1: Outcome measures assessed for step wedge cluster randomised trial of effectiveness of training in Emergency Obstetric Care**

| <b>Outcome</b>                                | <b>Definition</b>                                                                                                     |
|-----------------------------------------------|-----------------------------------------------------------------------------------------------------------------------|
| <b>Primary outcomes</b>                       |                                                                                                                       |
| Stillbirths<br>Stillbirth rate (SBR)          | Number of still births per 1000 births                                                                                |
| Early Neonatal Death Rate (ENNDr)             | Number of facility based early neonatal deaths per 1000 live births                                                   |
| Institutional maternal mortality ratio (iMMR) | Number of maternal deaths (direct and indirect) per 100,000 live births                                               |
| Direct Obstetric Case Fatality Rate (CFR)     | Number of maternal deaths due to direct obstetric complications per 100 cases of direct obstetric complications       |
| <b>Secondary outcomes</b>                     |                                                                                                                       |
| CFR – all complications                       | Number of maternal deaths due to obstetric complications per 100 cases with an obstetric complication                 |
| Indirect Obstetric CFR                        | Number of maternal deaths due to indirect obstetric complications, per 100 cases of indirect obstetric complications, |
| <b>CFR by type of complication</b>            | <b>Number of deaths per 100 cases due to</b>                                                                          |
| All Haemorrhage CFR                           | Abruptio, Placenta previa, PPH or Retained placenta                                                                   |
| Postpartum Haemorrhage (PPH) CFR              | PPH only (sub set of above)                                                                                           |
| (Pre-)Eclampsia CFR                           | (Pre-)Eclampsia                                                                                                       |
| Postpartum Sepsis CFR                         | Sepsis in the postpartum period                                                                                       |
| Obstructed labour CFR                         | Obstructed labour                                                                                                     |
| Ruptured uterus                               | Ruptured uterus                                                                                                       |
| <b>Complication rates</b>                     | <b>Number of complications per 100 births due to</b>                                                                  |
| Any cause                                     | All direct and indirect complications                                                                                 |
| All Haemorrhage rate                          | Abruptio, Placenta previa, PPH or Retained placenta                                                                   |
| PPH rate                                      | PPH only (sub set of above)                                                                                           |
| (Pre-)Eclampsia rate                          | (Pre-)Eclampsia complications                                                                                         |
| Postpartum Sepsis rate                        | Postpartum sepsis                                                                                                     |
| Obstructed labour rate                        | Obstructed labour                                                                                                     |
| Ruptured uterus                               | Ruptured uterus                                                                                                       |
