# Supplementary material
Source: HighWire-hosted journal article supplement (https://gh.bmj.com/content/4/6/e001670)
Supplement: inline-supplementary-material-2 [file inline-supplementary-material-2.pdf]

**Supplementary Table 2: Data Quality Issues**

The following corrections have been made to data in the database, further to discrepancies identified in the data

| <b>Records affected</b>                                                                 | <b>Variables changed</b>                        | <b>Changes made</b>               | <b>Reason</b>                                                                                            |
|-----------------------------------------------------------------------------------------|-------------------------------------------------|-----------------------------------|----------------------------------------------------------------------------------------------------------|
| Those in which total live births was not equal with total births plus total stillbirths | Total live births                               | =total births – total stillbirths | Inconsistent data                                                                                        |
| All records                                                                             | Total deliveries                                | Data not used                     | Data incorrectly derived from total births – usually matches even though there were some multiple births |
| A BEmOC facility (115) in district 2 with >160 deliveries at baseline in Feb 2014       | Five obstetric complications - number of cases  | Set to missing                    | Number of deaths reported exceeds number of cases                                                        |
|                                                                                         | Five obstetric complications - number of deaths | Set to missing                    |                                                                                                          |
|                                                                                         | Total direct complications - number of cases    | Values swapped                    | Numbers of cases was 0 but 28 deaths were reported                                                       |
|                                                                                         | Total direct complications - number of deaths   |                                   |                                                                                                          |
| A CEmOC facility (52) in district 3 with >160 deliveries at baseline in Aug 2014        | Number of postpartum sepsis cases               | Set to missing                    | Number of sepsis cases in all other month's totals 2; reported number of 114 is not plausible            |
| 7 records from 4 facilities                                                             | Total direct complications – number of cases    | Set to missing                    | Missing data for the number of cases for some complications                                              |
|                                                                                         | Total direct complications – number of deaths   | Set to missing                    | Missing data for the number of cases for some complications                                              |
|                                                                                         | Total complications – number of cases           | Set to missing                    | Missing data for the number of cases for some complications                                              |
|                                                                                         | Total complications – number of deaths          | Set to missing                    | Missing data for the number of cases for some complications                                              |
