# Supplementary material
Source: HighWire-hosted journal article supplement (https://gh.bmj.com/content/4/6/e001670)
Supplement: inline-supplementary-material-3 [file inline-supplementary-material-3.pdf]

**Supplementary Table 3: Estimated components of variance for each outcome**

| Outcome                                                                              | Log<br>(alpha)*        | Variances            |                      |
|--------------------------------------------------------------------------------------|------------------------|----------------------|----------------------|
|                                                                                      |                        | District<br>(95% CI) | Facility<br>(95% CI) |
| <b>Primary outcomes</b>                                                              |                        |                      |                      |
| Stillbirths<br>Stillbirth rate (per 1,000 births)                                    | -3.89<br>(-4.26,-3.51) | 0.01<br>(0.00,0.18)  | 0.20<br>(0.12,0.32)  |
| Newborns:<br>Early Neonatal Death Rate (per 1,000 live births)                       | -1.57<br>(-2.20,-0.94) | 0.00<br>(0.00,0.00)  | 0.29<br>(0.17,0.49)  |
| Maternal: Institutional maternal mortality ratio (iMMR)<br>(per 100,000 live births) | -0.81<br>(-1.68,0.06)  | 0.06<br>(0.01,0.75)  | 0.58<br>(0.22,1.49)  |
| Direct obstetric CFR                                                                 | -0.21<br>(-0.58,0.17)  | 0.14<br>(0.04,0.49)  | 0.76<br>(0.32,1.82)  |
| <b>Secondary outcomes</b>                                                            |                        |                      |                      |
| iMMR for <u>direct</u> maternal deaths only                                          | -0.64<br>(-1.23,-0.05) | 0.02<br>(0.00,137)   | 0.74<br>(0.31,1.78)  |
| iMMR for <u>indirect</u> maternal deaths only                                        | -11.2<br>(-41.5,19.0)  | 1.64<br>(0.47,5.69)  | 0.00<br>(0.00,0.00)  |
| <b>Obstetric Case Fatality Rates (CFR)</b>                                           |                        |                      |                      |
| CFR – all complications (direct & indirect)                                          | -0.34<br>(-0.81,0.13)  | 0.17<br>(0.06,0.53)  | 0.85<br>(0.30,2.25)  |
| Indirect obstetric CFR                                                               | -15.6<br>(-16.6,-14.7) | 0.00<br>(0.00,0.00)  | 1.15<br>(0.15,8.62)  |
| <b>CFR by type of complication</b>                                                   |                        |                      |                      |
| Haemorrhage <sup>d</sup>                                                             | -0.26<br>(-1.93,1.40)  | 0.00<br>(0.00,0.00)  | 0.86<br>(0.32,2.31)  |
| PPH <sup>d</sup>                                                                     | -0.34<br>(-1.88,1.20)  | 0.00<br>(0.00,0.00)  | 1.44<br>(0.59,3.50)  |
| Eclampsia                                                                            | -0.19<br>(-1.82,1.44)  | 0.00<br>(0.00,0.00)  | 1.07<br>(0.40,2.91)  |
| Postpartum sepsis <sup>d,e</sup>                                                     | 0.25<br>(-0.78,1.29)   | 0.52<br>(0.18,1.52)  | n/a                  |
| Obstructed labour                                                                    |                        | n/a                  | n/a                  |
| Ruptured uterus <sup>d,e</sup>                                                       | 0.24<br>(-1.16,1.63)   | 0.00<br>(0.00,0.00)  | n/a                  |
| <b>Complication rates</b>                                                            |                        |                      |                      |
| Any complication                                                                     | -1.26<br>(-1.61,-0.90) | 0.10<br>(0.05,0.19)  | 0.45<br>(0.27,0.75)  |
| Haemorrhage                                                                          | -1.62<br>(-1.90,-1.34) | 0.08<br>(0.03,0.23)  | 0.26<br>(0.16,0.42)  |
| PPH                                                                                  | -0.88<br>(-1.06,-0.70) | 0.05<br>(0.01,0.24)  | 0.50<br>(0.35,0.71)  |
| Eclampsia                                                                            | -0.65<br>(-0.93,-0.38) | 0.10<br>(0.03,0.36)  | 0.85<br>(0.61,1.19)  |

| Outcome           | Log<br>(alpha)*       | Variances            |                      |
|-------------------|-----------------------|----------------------|----------------------|
|                   |                       | District<br>(95% CI) | Facility<br>(95% CI) |
| Postpartum sepsis | 0.15<br>(-0.46,0.75)  | 0.20<br>(0.03,1.14)  | 1.93<br>(1.09,3.42)  |
| Obstructed labour | -0.27<br>(-0.58,0.04) | 0.08<br>(0.02,0.32)  | 1.06<br>(0.67,1.68)  |
| Ruptured uterus   | 0.67<br>(0.02,1.33)   | 0.27<br>(0.06,1.23)  | 0.78<br>(0.54,1.13)  |

\* alpha measures the magnitude of conditional over-dispersion and is a positive quantity; log(alpha) is a rescaling used in model fitting and estimation
